# Supplementary material for: Visible-light-driven photocatalytic CO2 reduction over ketoenamine-based covalent organic frameworks: role of the host functional groups
Source: Royal Society of Chemistry journal article supplement (doi:10.1039/d0cy02061c), 2020-12-16
Supplement: d0cy02061c1.pdf [file d0cy02061c1.pdf]

## Supplementary Material

### **Visible-light-driven photocatalytic CO<sub>2</sub> reduction over ketoenamine-based covalent organic frameworks: Role of the host functional groups**

Lianlian Peng,<sup>a</sup> Shuqing Chang,<sup>a</sup> Ziling Liu,<sup>a</sup> Yanghe Fu,<sup>a,b,\*</sup> Rui Ma,<sup>a,b</sup> Xinqing Lu,<sup>a,b</sup>  
Fumin Zhang,<sup>a,b</sup> Weidong Zhu,<sup>a,b,\*</sup> Lichun Kong<sup>a</sup> and Maohong Fan<sup>c,\*</sup>

<sup>a</sup> *Key Laboratory of the Ministry of Education for Advanced Catalysis Materials,  
Institute of Physical Chemistry, Zhejiang Normal University, Jinhua 321004, China*

<sup>b</sup> *Zhejiang Engineering Laboratory for Green Syntheses and Applications of Fluorine-  
Containing Specialty Chemicals, Institute of Advanced Fluorine-Containing Materials,  
Zhejiang Normal University, Jinhua 321004, China*

<sup>c</sup> *Department of Chemical and Petroleum Engineering, University of Wyoming, Laramie,  
WY 82071, USA.*

---

\*Corresponding authors:

E-mail addresses: [yhfu@zjnu.cn](mailto:yhfu@zjnu.cn) (Y. Fu), [weidongzhu@zjnu.cn](mailto:weidongzhu@zjnu.cn) (W. Zhu), and  
[mfan@uwyo.edu](mailto:mfan@uwyo.edu) (m. Fan).

## Figures

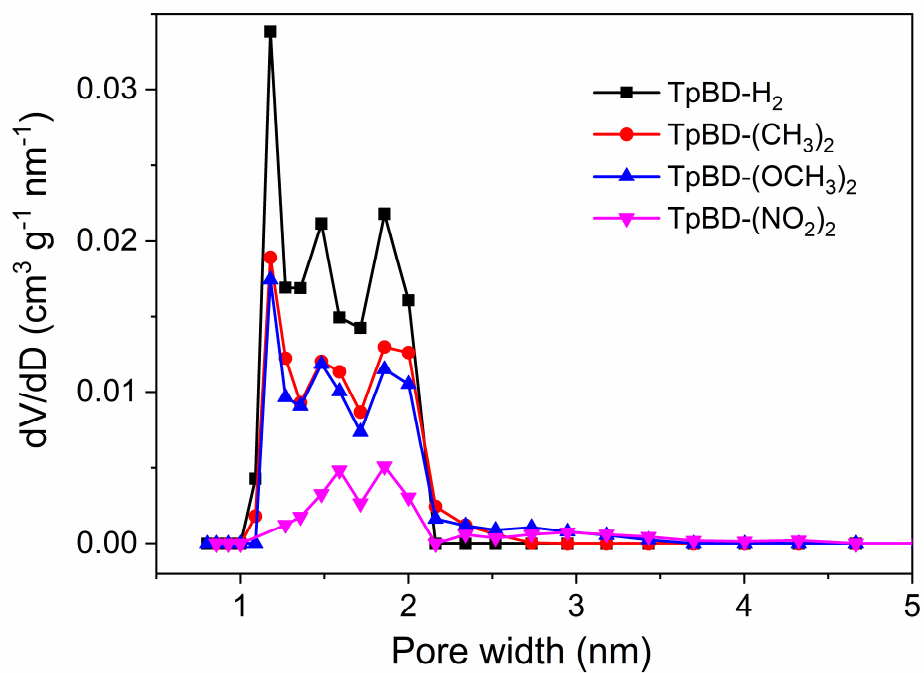

**Fig. S1.** Pore size distributions of the prepared samples extracted from the N<sub>2</sub> adsorption isotherms at -196 °C based on the density functional theory (DFT) method.

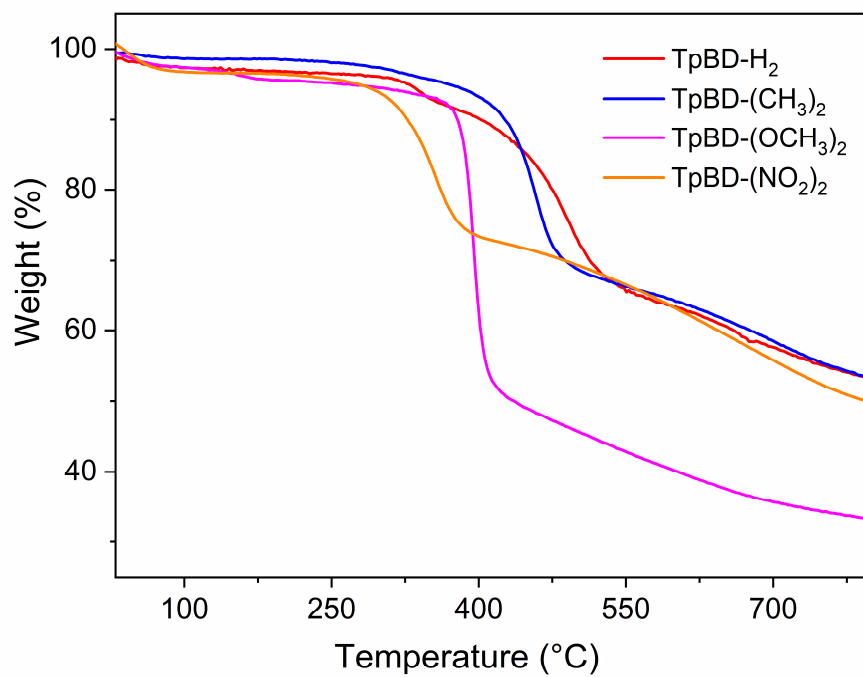

**Fig. S2.** TGA curves of the prepared samples in flowing N<sub>2</sub>.

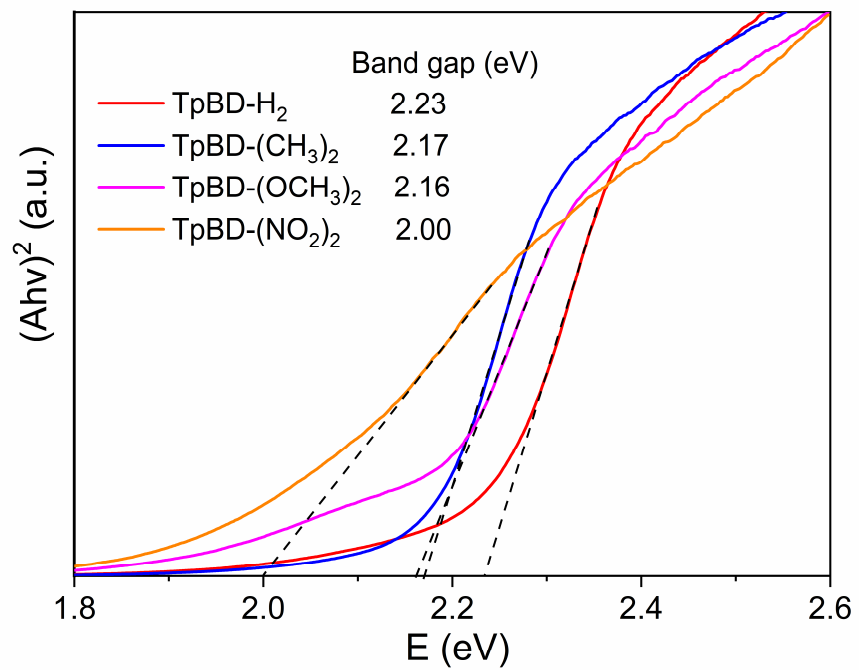

**Fig. S3.** Tauc plots of the prepared samples determined by the Kubelka-Munk function.

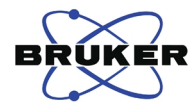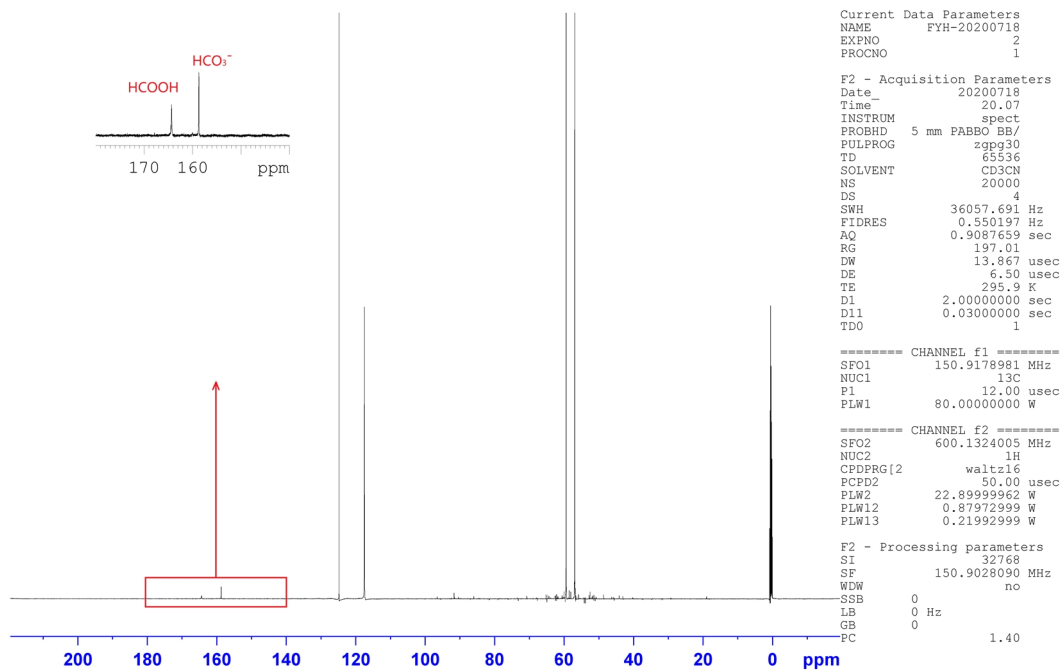

**Fig. S4.**  $^{13}\text{C}$  NMR spectra of the product solution from the photocatalytic reduction of  $^{13}\text{CO}_2$  over  $\text{TpBD}-(\text{OCH}_3)_2$  upon 24 h of visible light irradiation.

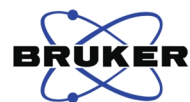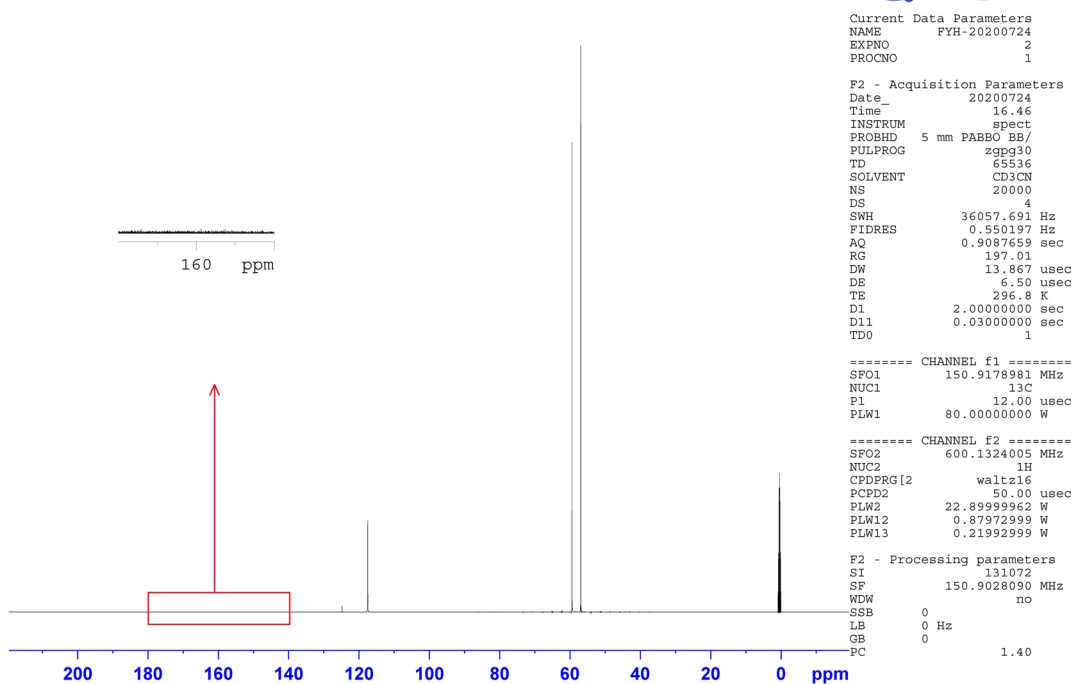

**Fig. S5.**  $^{13}\text{C}$  NMR spectra of the product solution from the photocatalytic reduction of  $^{12}\text{CO}_2$  over  $\text{TpBD}-(\text{OCH}_3)_2$  upon 24 h of visible light irradiation.

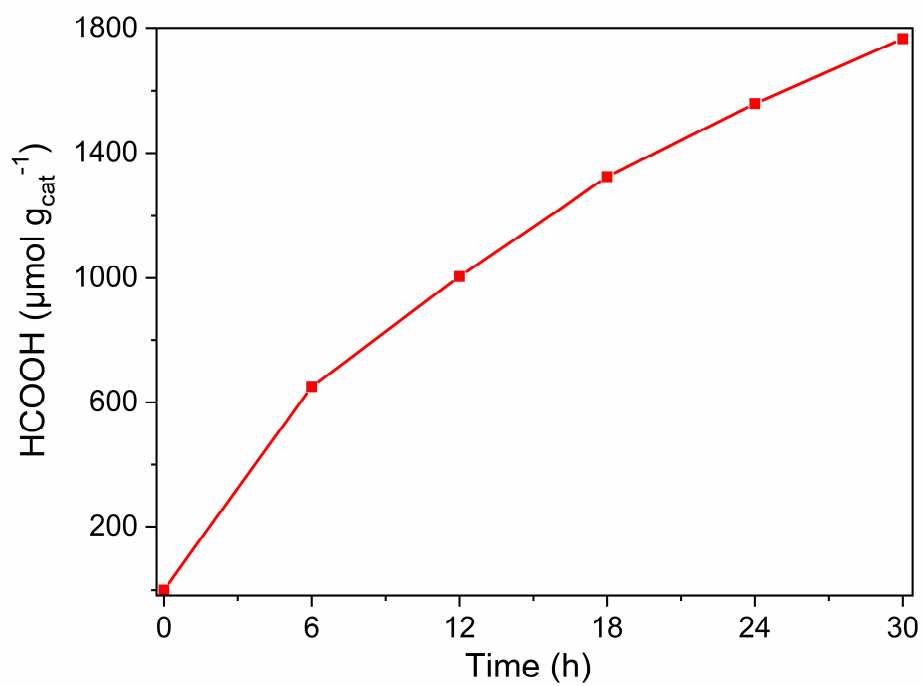

**Fig. S6.** Long-term stability test: the yield of HCOOH produced over TpBD-(OCH<sub>3</sub>)<sub>2</sub> as a function of visible-light irradiation time.

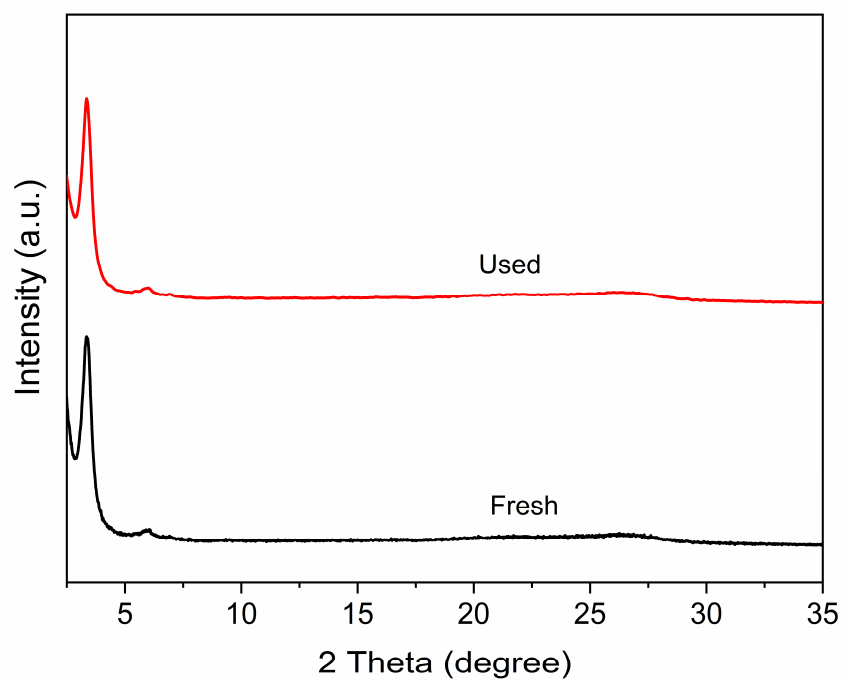

**Fig. S7.** PXRD patterns of the fresh (black) and the used TpBD-(OCH<sub>3</sub>)<sub>2</sub> after the 5<sup>th</sup>-run photocatalytic reaction (red).



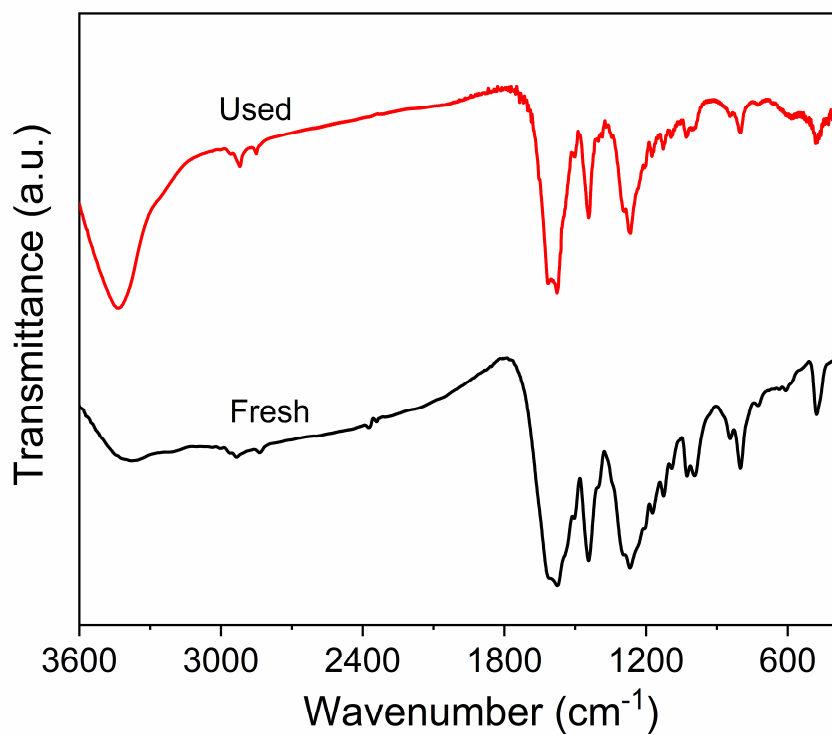

**Fig. S8.** FT-IR spectra of the fresh (black) and the used TpBD-(OCH<sub>3</sub>)<sub>2</sub> after the 5<sup>th</sup>-run photocatalytic reaction (red).

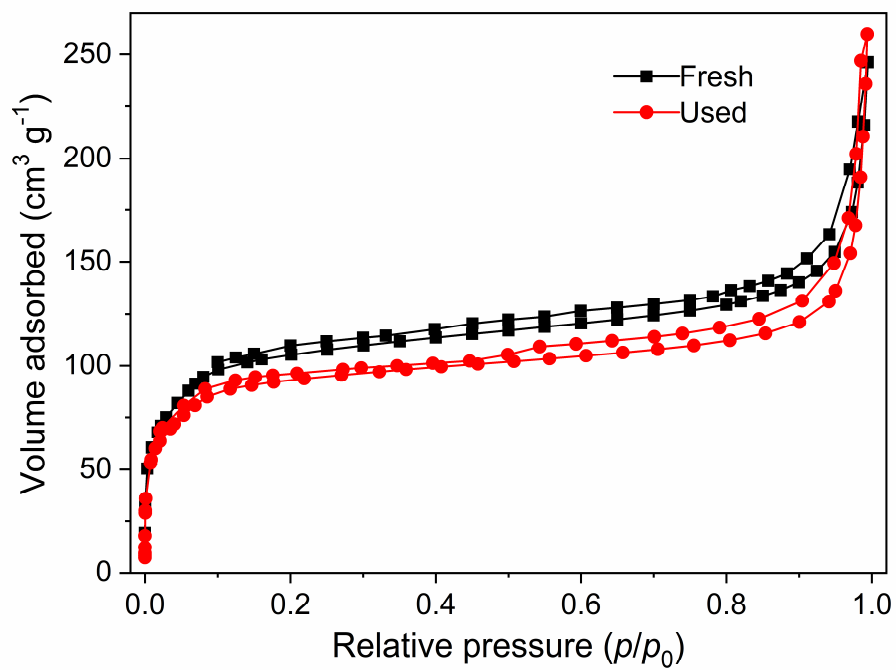

**Fig. S9.** Adsorption-desorption isotherms of N<sub>2</sub> on the fresh (black) and the used TpBD-(OCH<sub>3</sub>)<sub>2</sub> after the 5<sup>th</sup>-run photocatalytic reaction (red) at -196 °C.

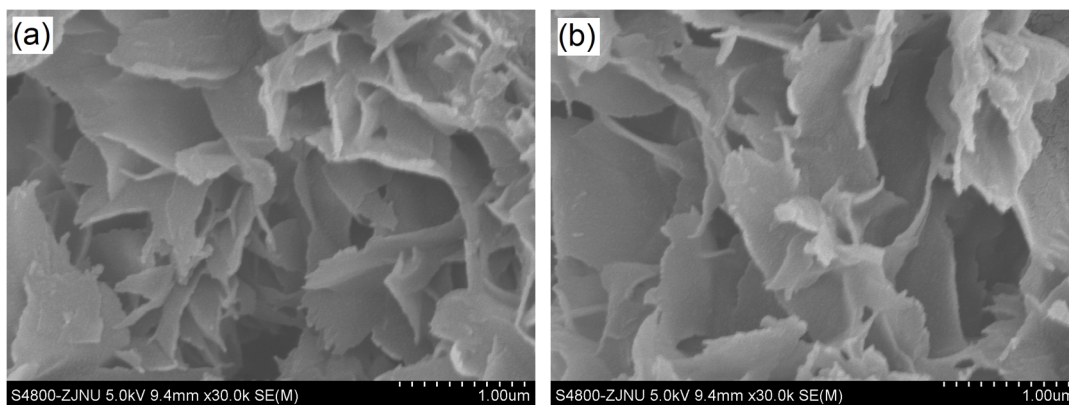

**Fig. S10.** SEM images of the fresh (a) and the used TpBD-(OCH<sub>3</sub>)<sub>2</sub> after the 5<sup>th</sup>-run photocatalytic reaction (b).

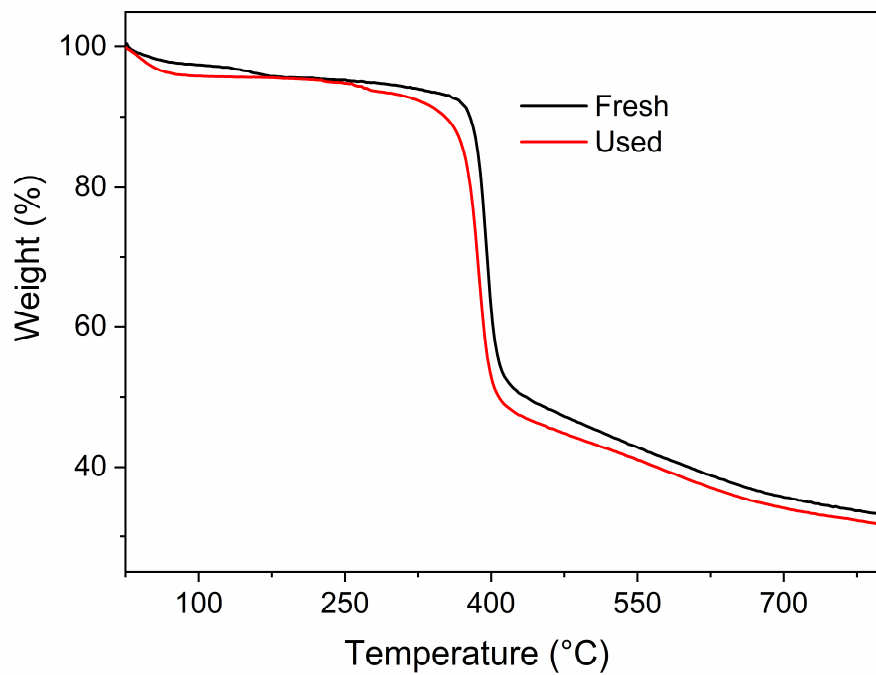

**Fig. S11.** TGA curves of the fresh (black) and the used TpBD-(OCH<sub>3</sub>)<sub>2</sub> after the 5<sup>th</sup>-run photocatalytic reaction (red).

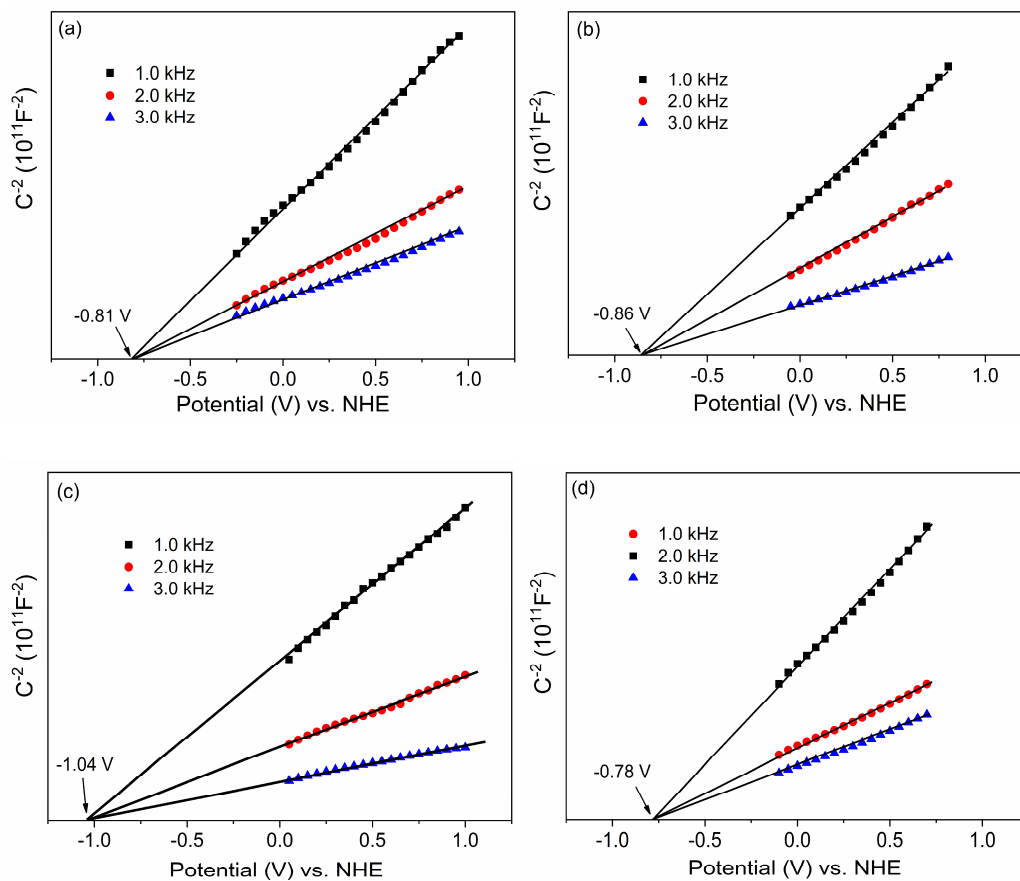

**Fig. S12.** Mott-Schottky plots of TpBD- $\text{H}_2$  (a), TpBD- $(\text{CH}_3)_2$  (b), TpBD- $(\text{OCH}_3)_2$  (c), and TpBD- $(\text{NO}_2)_2$  (d) measured at different frequencies.

## Tables

**Table S1.** Textural properties of TpBD-X determined by N<sub>2</sub> adsorption at -196 °C

| Sample                                | $S_{\text{BET}}$<br>m <sup>2</sup> g <sup>-1</sup> | $S_{\text{Langmuir}}$<br>m <sup>2</sup> g <sup>-1</sup> | $V_{\text{total}}^{\text{a}}$<br>cm <sup>3</sup> g <sup>-1</sup> |
|---------------------------------------|----------------------------------------------------|---------------------------------------------------------|------------------------------------------------------------------|
| TpBD-H <sub>2</sub>                   | 535                                                | 665                                                     | 0.252                                                            |
| TpBD-(CH <sub>3</sub> ) <sub>2</sub>  | 406                                                | 524                                                     | 0.241                                                            |
| TpBD-(OCH <sub>3</sub> ) <sub>2</sub> | 388                                                | 447                                                     | 0.224                                                            |
| TpBD-(NO <sub>2</sub> ) <sub>2</sub>  | 259                                                | 297                                                     | 0.131                                                            |

<sup>a</sup> Single point adsorption total pore volume at  $p/p_0 = 0.974$ .

**Table S2.** Summary of the photocatalytic CO<sub>2</sub> reduction performances over COF- and MOF-based catalysts

| Photocatalyst                         | Photosensitizer                        | Product                                                                   | Light source                      | Ref.      |
|---------------------------------------|----------------------------------------|---------------------------------------------------------------------------|-----------------------------------|-----------|
|                                       |                                        | Yield*<br>( $\mu\text{mol}\cdot\text{g}^{-1}_{\text{cat}}\text{h}^{-1}$ ) |                                   |           |
| TpBD-H <sub>2</sub>                   | -                                      | HCOOH: 45.7                                                               | 300 W Xe lamp<br>(420-800 nm)     | This work |
| TpBD-(CH <sub>3</sub> ) <sub>2</sub>  | -                                      | HCOOH: 86.3                                                               | 300 W Xe lamp<br>(420-800 nm)     | This work |
| TpBD-(OCH <sub>3</sub> ) <sub>2</sub> | -                                      | HCOOH: 108.3                                                              | 300 W Xe lamp<br>(420-800 nm)     | This work |
| TpBD-(NO <sub>2</sub> ) <sub>2</sub>  | -                                      | HCOOH: 22.2                                                               | 300 W Xe lamp<br>(420-800 nm)     | This work |
| TpPa-1                                | -                                      | HCOOH: 32.4                                                               | 300 W Xe lamp<br>(420-800 nm)     | 1         |
| 3.0 wt.% Ru/TpPa-1                    | -                                      | HCOOH: 108.8                                                              | 300 W Xe lamp<br>(420-800 nm)     | 1         |
| ACOF-1                                | -                                      | CH <sub>3</sub> OH: 0.36                                                  | 500 W Xe lamp<br>(420-800 nm)     | 2         |
| N <sub>3</sub> -COF                   | -                                      | CH <sub>3</sub> OH: 0.57                                                  | 500 W Xe lamp<br>(420-800 nm)     | 2         |
| TTCOF-Zn                              | -                                      | CO: 2.1                                                                   | 300 W Xe lamp<br>(420-800 nm)     | 3         |
| COF-318-TiO <sub>2</sub>              | -                                      | CO: 69.7                                                                  | 300 W Xe lamp<br>(380-800 nm)     | 4         |
| CT-COF                                | -                                      | CO: 102.7                                                                 | 300 W Xe lamp<br>( $\geq 420$ nm) | 5         |
| Ni-TpBpy                              | [Ru(bpy) <sub>3</sub> ]Cl <sub>2</sub> | CO: 324.6                                                                 | 300 W Xe lamp<br>( $\geq 420$ nm) | 6         |
| Re-CTF                                | [Re(CO) <sub>5</sub> ]Cl               | CO: 353.1                                                                 | 300 W Xe lamp<br>(200-1100 nm)    | 7         |
| Re-COF                                | [Re(CO) <sub>5</sub> ]Cl               | CO: 750                                                                   | 225 W Xe lamp<br>( $\geq 420$ nm) | 8         |
| Re-TpBpy                              | [Re(CO) <sub>5</sub> ]Cl               | CO: 270.8                                                                 | 200 W Xe lamp<br>( $\geq 390$ nm) | 9         |
| DQTP COF-Zn                           | [Ru(bpy) <sub>3</sub> ]Cl <sub>2</sub> | HCOOH: 71.8<br>CO: 3.8                                                    | 300 W Xe lamp<br>( $\geq 420$ nm) | 10        |
| DQTP COF-Co                           | [Ru(bpy) <sub>3</sub> ]Cl <sub>2</sub> | HCOOH: 333.5<br>CO: 480                                                   | 300 W Xe lamp<br>( $\geq 420$ nm) | 10        |
| Ni-PCD@TD-COF                         | [Ru(bpy) <sub>3</sub> ]Cl <sub>2</sub> | CO: 95.6                                                                  | 300 W Xe lamp<br>( $\geq 420$ nm) | 11        |
| NH <sub>2</sub> -MIL-125(Ti)          | -                                      | HCOOH: 16.3                                                               | 300 W Xe lamp<br>(420-800 nm)     | 12        |
| NH <sub>2</sub> -UiO-66(Zr)           | -                                      | HCOOH: 26.4                                                               | 300 W Xe lamp<br>(420-800 nm)     | 13        |

|                                 |   |             |                               |    |
|---------------------------------|---|-------------|-------------------------------|----|
| Pt/NH <sub>2</sub> -MIL-125(Ti) | - | HCOOH: 25.9 | 300 W Xe lamp<br>(420-800 nm) | 14 |
| PCN-222(Zr)                     | - | HCOOH: 60   | 300 W Xe lamp<br>(420-800 nm) | 15 |

#### References:

- [1] K. Guo, X. Zhu, L. Peng, Y. Fu, R. Ma, X. Lu, F. Zhang, W. Zhu and M. Fan, *Chem. Eng. J.*, 2021, **405**, 127011.
- [2] Y. Fu, X. Zhu, L. Huang, X. Zhang, F. Zhang and W. Zhu, *Appl. Catal. B Environ.*, 2018, **239**, 46-51.
- [3] M. Lu, J. Liu, Q. Li, M. Zhang, M. Liu, J. Wang, D. Yuan and Y. Lan, *Angew. Chem. Int. Ed.*, 2019, **58**, 12392-12397.
- [4] M. Zhang, M. Lu, Z. Lang, J. Liu, M. Liu, J. Chang, L. Li, L. Shang, M. Wang, S. Li and Y. Lan, *Angew. Chem. Int. Ed.*, 2020, **59**, 6500-6506.
- [5] K. Lei, D. Wang, L. Ye, M. Kou, Y. Deng, Z. Ma, L. Wang and Y. Kong, *ChemSusChem*, 2020, **13**, 1725-1729.
- [6] W. Zhong, R. Sa, L. Li, Y. He, L. Li, J. Bi, Z. Zhuang, Y. Yu and Z. Zou, *J. Am. Chem. Soc.*, 2019, **141**, 7615-7621.
- [7] R. Xu, X. Wang, H. Zhao, H. Lin, Y. Huang and R. Cao, *Catal. Sci. Technol.*, 2018, **8**, 2224-2230.
- [8] S. Yang, W. Hu, X. Zhang, P. He, B. Pattengale, C. Liu, M. Cendejas, I. Hermans, X. Zhang, J. Zhang and J. Huang, *J. Am. Chem. Soc.*, 2018, **140**, 14614-14618.
- [9] S.-Y. Li, S. Meng, X. Zou, M. El-Roz, I. Telegeev, O. Thili, T. X. Liu and G. Zhu, *Microporous Mesoporous Mater.*, 2019, **285**, 195-201.
- [10] M. Lu, Q. Li, J. Liu, F. Zhang, L. Zhang, J. Wang, Z. Kang and Y. Lan, *Appl.*



*Catal. B Environ.*, 2019, **254**, 624-633.

- [11] H. Zhong, R. Sa, H. Lv, S. Yang, D. Yuan, X. Wang and R. Wang, *Adv. Funct. Mater.*, 2020, **30**, 2002654.
- [12] Y. Fu, D. Sun, Y. Chen, R. Huang, Z. Ding, X. Fu and Z. Li, *Angew. Chem. Int. Ed.*, 2012, **51**, 3364-3367.
- [13] D. Sun, Y. Fu, W. Liu, L. Ye, D. Wang, L. Yang, X. Fu and Z. Li, *Chem. Eur. J.*, 2013, **19**, 14279-14285.
- [14] D. Sun, W. Liu, Y. Fu, Z. Fang, F. Sun, X. Fu, Y. Zhang and Z. Li, *Chem. Eur. J.*, 2014, **20**, 4780-4788.
- [15] H. Xu, J. Hu, D. Wang, Z. Li, Q. Zhang, Y. Luo, S. Yu and H Jiang, *J. Am. Chem. Soc.*, 2015, **137**, 13440-13443.
